# Supplementary material
Source: Elsevier journal article supplement (https://www.sciencedirect.com/science/article/pii/S0210569115001138)
Supplement: mmc1 [file S0210569115001138:mmc1.docx]

ANEXO PARA LA PUBLICACIÓN ONLINE.

Nota de los autores: Para la elaboración de las recomendaciones se ha seguido la metodología sugerida por el GRADE Working Group. A continuación, se exponen en las tablas 1-3 algunos aspectos interesantes de su aplicación (basadas en las referencias: *Guyatt GH, Oxman AD, Kunz R, Vist GE, Falck-Ytter Y, Schünemann HJ; GRADE Working Group . What is “quality of evidence” and why is it important to clinicians? BMJ.2008;336(7651):995-998* y *Guyatt GH, Oxman AD, Kunz R, Falck-Ytter Y, Vist GE, Liberati A, et al., GRADE Working Group. Going from evidence to recommendations. BMJ. 2008;336:1049–51*.)

Tabla 1. Evaluación de la calidad de la evidencia científica y factores modificadores

| **Calidad de la evidencia científica** | **Diseño de estudio** | **Disminuir si…** | **Aumentar si…** |
| --- | --- | --- | --- |
| **Alta** | Ensayo clínico aleatorizado | - Importante **(-1)**   o muy importante **(-2)** **limitación de la calidad** del estudio   - **Inconsistencia** importante **(-1)** - Alguna **(-1)** o gran **(-2)** incertidumbre acerca de la que **evidencia** sea **directa** - Datos escasos o imprecisos **(-1)** - Alta probabilidad de sesgo de notificación **(-1)** | - **Asociación**: evidencia de una **fuerte** asociación: RR > 2 ó < 0,5 basado en estudios observacionales sin factores de confusión **(+1).** Evidencia de una **muy fuerte** asociaciónRR > 5 ó < 0,2 basada en evidencia sin posibilidad de sesgos **(+2)** - Gradiente dosis respuesta **(+1)** - Todos los posibles factores confusores podrían haber reducido el efecto observado **(+1)** |
| **Moderada** |
| **Baja** | Estudio observacional |
| **Muy baja** | Cualquier otra evidencia científica |

Tabla 2. Clasificación de la calidad de la evidencia para las distintas variables.

| **Alta** | Es muy poco probable que nuevos estudios cambien la confianza que tenemos en el resultado estimado. |
| --- | --- |
| **Moderada** | Es probable que nuevos estudios tengan un impacto importante en la confianza que tenemos en el resultado estimado y que éstos puedan modificar el resultado. |
| **Baja** | Es muy probable que nuevos estudios tengan un impacto importante en la confianza que tenemos en el resultado estimado y que éstos puedan modificar el resultado. |
| **Muy baja** | Cualquier resultado estimado es muy incierto. |

Tabla 3. Graduación y justificación de las recomendaciones según el sistema GRADE.

|  | Relación beneficios/riesgos | Calidad de la evidencia | Implicaciones |
| --- | --- | --- | --- |
| 1A  Recomendación fuerte  Calidad de la evidencia alta | Los beneficios superan claramente a los riesgos y a las barreras o viceversa | ECA sin limitaciones importantes o estudios observacionales con evidencia muy fuerte | Recomendación fuerte: aplicable a la mayoría de pacientes en la mayoría de situaciones, sin limitaciones. |
| 1B  Recomendación fuerte  Calidad de la evidencia moderada | Los beneficios superan claramente a los riesgos y a las barreras o viceversa | ECA con importantes limitaciones (inconsistencia, imprecisión, debilidad metodológica…), o excepcionalmente estudios observacionales con fuerte evidencia | Recomendación fuerte: aplicable a la mayoría de pacientes en la mayoría de situaciones |
| 1C  Recomendación fuerte  Calidad de la evidencia baja | Los beneficios superan claramente a los riesgos y a las barreras o viceversa | Estudios observacionales o series de casos, o ECA con limitaciones muy serias o evidencia indirecta | Recomendación fuerte, pero puede cambiar cuando haya disponibilidad de una mayor calidad de evidencia |
| 2A  Recomendación débil  Calidad de la evidencia alta | Los beneficios se encuentran equilibrados con los riesgos y las barreras | ECA sin limitaciones importantes o estudios observacionales con evidencia muy fuerte | Recomendación débil: la mejor acción dependerá de las circunstancias del paciente o de los valores sociales |
| 2B  Recomendación débil  Calidad de la evidencia moderada | Los beneficios se encuentran equilibrados con los riesgos y las barreras | ECA con importantes limitaciones (inconsistencia, imprecisión, debilidad metodológica…), o excepcionalmente estudios observacionales con fuerte evidencia | Recomendación débil: la mejor acción dependerá de las circunstancias del paciente o de los valores sociales, pudiendo existir alternativas mejores en determinadas situaciones |
| 2C  Recomendación débil  Calidad de la evidencia baja | Existe incertidumbre en la estimación de los beneficios, riesgos y barreras, que deben pueden estar equilibrados | Estudios observacionales o series de casos, o ECA con limitaciones muy serias o evidencia indirecta | Recomendación muy débil: otras alternativas pueden ser igualmente razonables |

TABLA 4. Variables incluidas en el TASH score para predicción de recibir una transfusión masiva.

| PARÁMETRO | ESCALA | PUNTUACIÓN |
| --- | --- | --- |
| Hemoglobina | < 7 g/dl  7-9 g/dl  9-10 g/dl  10-11 g/dl  11-12 g/dl  > 12 g/dl | 8  6  4  3  2  0 |
| Exceso de bases | < -10  -6 a -10  -2 a -6  > -2 | 4  3  1  0 |
| Presión arterial sistólica | < 100 mmHg  100-120 mmHg  > 120 mmHg | 4  1  0 |
| Frecuencia cardiaca | > 120 lpm  < 120 lpm | 2  0 |
| Líquido libre abdominal | Sí  No | 3  0 |
| Fractura inestable de pelvis | Sí  No | 6  0 |
| Fractura abierta fémur | Sí  No | 3  0 |
| Sexo | Varón  Mujer | 1  0 |

El resultado del TASH score puede estar comprendido entre 0 y 31 puntos, correspondiendo a una puntuación de 18 un riesgo del 50% de recibir una transfusión masiva.

Tabla 5. Escala de ABC (*Assessment of Blood Consumption*) de predicción de riesgo de transfusión masiva.

| PARÁMETRO | PUNTUACIÓN |
| --- | --- |
| Mecanismo penetrante | 1 |
| Presión arterial sistólica <90mmHg | 1 |
| Frecuencia cardiaca >120 latidos | 1 |
| Líquido libre intraabdominal valorado por ecografía | 1 |

Una puntuación igual o superior a 2 se considera buen predictor de riesgo de transfusión masiva (sensibilidad 76,1% y especificidad 70,3%).

Tabla 6. Pasos necesarios para la implementación de un protocolo de transfusión masiva.

| 1. Crear un equipo multidisciplinar formado al menos por cirujanos, anestesiólogos, hematólogos, intensivistas, enfermería y personal de laboratorio y del banco de sangre que sea responsable de la elaboración del protocolo. Además, los comités de transfusión deberían participar en la elaboración de estos protocolos y velar por su adecuado cumplimiento. |
| --- |
| 1. Establecer criterios de activación basados en parámetros clínicos y analíticos que identifiquen a pacientes en riesgo de recibir una TM. |
| 1. Revisar la literatura e implementar algoritmos que establezcan las indicaciones de uso de componentes sanguíneos y de fármacos prohemostáticos basándose en la evidencia científica. |
| 1. La consideración de disponer de los llamados “paquetes de TM”, que son hemocomponentes (CH, PF y PLQ) distribuidos en proporción fija previamente establecida, para su administración durante la TM. Aunque puede variar entre los distintos Centros, generalmente se establece una proporción PFC/CH entre 1:1 y 1:2 y PLQ:CH 1 *pool*:6 |
| 1. Identificar y proponer soluciones a aspectos logísticos fundamentales para el adecuado funcionamiento del protocolo, como son la comunicación entre servicios, el transporte de los componentes sanguíneos y la monitorización rápida y eficaz del estado de shock, así como la coagulopatía. |
| 1. Disponer de test viscoelásticos a la cabecera del paciente para guiar el tratamiento dado que en base a sus resultados puede reducir las necesidades de transfusión[38](#_ENREF_38). |
| 1. Informar y formar a todas las partes implicadas en el manejo del paciente sangrante. |
| 1. Considerar una fase de entrenamiento previa a la implantación definitiva del protocolo. |
| 1. Instaurar un control de calidad del protocolo en cuanto a revisión del cumplimiento y a comunicación frecuente de los problemas y deficiencias que se detecten, entre los clínicos que manejan el sangrado y los que diseñan el protocolo. |
| 1. Evaluar el impacto de la instauración del protocolo y compartir regularmente los resultados con todo el equipo implicado. |

Tabla 7. Escala ATLS (*Advanced Trauma Life Support*) para valoración de la extensión y severidad de la hemorragia en relación con el volumen de pérdida de sangre (adaptación).

|  | GRADO 1 | GRADO 2 | GRADO 3 | GRADO 4 |
| --- | --- | --- | --- | --- |
| Pérdida de sangre (ml) | < 750 | 750-1500 | 1500-2000 | > 2000 |
| Pérdida de sangre  (% de volumen plasmático) | < 15% | 15-30% | 30-40% | > 40% |
| Frecuencia cardiaca (lpm) | < 100 | > 100 | > 120 | > 140 |
| Presión arterial sistólica | Normal | Normal | Disminuida | Disminuida |
| Débito urinario (ml(h) | > 30 | 20-30 | 5-15 | Anuria |
| Estado mental | Ligeramente ansioso | Medianamente ansioso | Ansioso, confuso | Confuso, letárgico |

Tabla 8. Sistemas que permiten evitar o corregir la hipotermia en pacientes con hemorragia masiva.

| - Aumento de la temperatura ambiental - Calentamiento de la superficie del paciente con mantas - Respiradores que calientan y humidifican los gases inspirados - Calentadores de fluidos - Sistemas de recalentamiento extracorpóreo (en casos extremos) |
| --- |

Tabla 9: Resumen de recomendaciones consensuadas*.*

| **Nº** | **Recomendación** | **NE/GR** |
| --- | --- | --- |
| 1 | En la evaluación de la extensión y/o gravedad de la hemorragia son importantes: el examen clínico (mecanismo traumático, patrón anatómico y respuesta inicial) junto a la aplicación de escalas de predicción de transfusión masiva como el TASH (Trauma-Associated Severe Hemorrhage). | 2C |
| 2 | Para la identificación temprana de pacientes traumáticos beneficiarios de una activación del protocolo de transfusión masiva, se sugiere utilizar el TASH (puntuación de corte 15), preferentemente asociado a la disminución de la firmeza del coágulo en la tromboelastometría rotacional o en el TEG, en el caso de que estén disponibles. | 2C |
| 3 | Es recomendable que las instituciones elaboren protocolos de transfusión masiva coordinados de forma multidisciplinar, con algoritmos de tratamiento basados en la evidencia científica. Así mismo, se sugiere realizar campañas informativas y de entrenamiento a los equipos implicados y evaluar periódicamente su cumplimiento y su efectividad. | C |
| 4 | Se sugiere basar la valoración inicial en la historia clínica y la anamnesis (si es posible), y en la determinación secuencial de la TA, la FC y el IS. La determinación del exceso de bases y del lactato en la muestra arterial en estos pacientes puede ayudar en la valoración de los pacientes de mayor gravedad, fundamentalmente en el ámbito del paciente politraumatizado. | 2C |
| 5 | La clasificación del shock hemorrágico de la ATLS para la valoración de la extensión de la hemorragia mantiene su validez, basada en su rapidez, accesibilidad y ausencia de requerimientos de laboratorio. | B |
| 6 | Para la evaluación de la extensión de la hemorragia en el ámbito prehospitalario se sugiere emplear el criterio de clasificación T-RTS (GCS -Glasgow Coma Scale-, TAS y FR) frente al TS, dado que se aplica más fácilmente y ha demostrado mejor capacidad de valoración. | C |
| 7 | En los pacientes con hemorragia masiva, se recomienda la rápida aplicación de medias que eviten la pérdida de calor y la hipotermia, manteniendo la temperatura central por encima de 35ºC.  De entre las medidas para evitar la hipotermia, se sugiere usar calentadores de infusión rápida para todos los fluidos que se administren durante una transfusión masiva y considerar los sistemas de calentamiento extracorpóreo en pacientes con hipotermia severa y alto riesgo de parada cardíaca. | 1B  2C |
| 8 | Se recomienda la terapia precoz con fluidos en el paciente con hemorragia grave e hipotensión, empleando preferentemente cristaloides isotónicos en lugar de coloides. | 1A |
| 9 | Se recomienda evitar las soluciones cristaloideas hipotónicas tipo Ringer Lactato en pacientes con traumatismo craneoencefálico grave. | 1C |
| 10 | Se sugiere valorar la administración de soluciones hipertónicas en pacientes con traumatismo craneoencefálico grave (2B) y en pacientes con lesiones penetrantes en el tronco (2C). | 2B-2C |
| 11 | En el caso de que el clínico decida administrar coloides, se recomienda utilizar una dosis dentro de los límites establecidos para cada solución y paciente. | 1B |
| 12 | En pacientes con HM se recomienda la administración precoz de hemoderivados (incluyendo CH, PF, plaquetas y fibrinógeno), además de la corrección simultánea de la hipovolemia. | 1B |
| 13 | Se sugiere que la reposición inicial de fluidos en el paciente con HM se base en la estimación de la pérdida de sangre y en la respuesta hemodinámica a la administración de fluidos. Se sugiere aplicar una “estrategia de reanimación hipotensiva” hasta que se haya controlado la fuente de hemorragia, siempre que no haya traumatismo craneoencefálico. | 2C |
| 14 | En pacientes traumatizados sangrantes, hipotensos y sin traumatismo craneoencefálico, se recomienda un objetivo de tensión arterial sistólica entre 80 y 90 mmHg hasta que la fuente de sangrado haya sido controlada. | 1C |
| 15 | En pacientes traumáticos con TCE grave se recomienda mantener una tensión arterial sistólica de al menos 110 mmHg o una tensión arterial media de al menos 80 mmHg. | 1C |
| 16 | Se sugiere que el uso de vasopresores tipo epinefrina o norepinefrina puede ser una opción para mantener la tensión arterial en ausencia de respuesta a la fluidoterapia. | 2C |
| 17 | Se recomienda la aplicación del concepto de cirugía de contención de daños en pacientes traumatizados que precisan control quirúrgico de sus lesiones y presentan coagulopatía con sangrado incoercible, acompañados de acidosis y/o hipotermia. Asimismo, deberá utilizarse esta estrategia ante lesiones anatómicas muy complejas o de difícil acceso y que requieran un prolongado tiempo quirúrgico. | 1B |
| 18 | Se recomienda la utilización de variables dinámicas como VVS y VPP, frente a las estáticas, para predecir la respuesta a la administración de fluidos en los pacientes con hemorragia severa en ventilación mecánica controlada y ritmo cardiaco normal que no responden a la terapia de reanimación inicial. | 1B |
| 19 | Se recomienda la determinación precoz y seriada de parámetros hematológicos como hemoglobina, lactato, exceso de bases (tanto arterial como venoso) y las pruebas de coagulación (tiempo de protrombina, INR tiempo de tromboplastina parcial activado (TTPa), fibrinógeno y plaquetas) para detectar precozmente la existencia de una coagulopatía. Estas pruebas parecen alterarse precozmente y ser un buen indicador pronóstico de estos pacientes. | 1C |
| 20 | Se recomienda la utilización de test viscoelásticos, como ROTEM o TEG, que pueden ayudar a detectar, controlar y orientar el tratamiento en la coagulopatía asociada a la hemorragia aguda, sobre todo en presencia de la tríada letal (hipotermia, coagulopatía y acidosis). | 1C |
| 21 | Se sugiere que los protocolos de transfusión en HM deben funcionar con un sistema de alarmas establecidas en las comisiones de hemoterapia de cada hospital, como un protocolo consensuado interdisciplinar, y analizando su eficacia y seguridad de forma periódica. | 2C |
| 22 | En el contexto de una HM se recomienda considerar la transfusión precoz de concentrados de hematíes. Como guía para la misma se recomienda considerar la evolución tanto de parámetros clínicos (TA, FC, IS) como de laboratorio (Hemoglobina (Hb), lactato, exceso de bases (EB)), evitando la transfusión en base a determinaciones aisladas, y siempre individualizando la situación clínica del paciente. | 1B |
| 23 | Se sugiere manejar la HM con una alta proporción de plasma fresco y plaquetas en relación con los concentrados de hematíes, porque parecen observarse mejores resultados especialmente en los pacientes politraumatizados (mejoría de la supervivencia y de la prevención y control de la coagulopatía). | 2C |
| 24 | En el contexto de una hemorragia masiva, se recomienda que la administración de plasma fresco se inicie precozmente para prevenir y/o tratar la coagulopatía. El volumen de plasma fresco recomendado debe basarse en parámetros clínicos (control de la hemorragia) y/o analíticos (test tromboelastográficos y/o de coagulación estándar). | 1C |
| 25 | Se recomienda la administración de concentrados de plaquetas para mantener un recuento de plaquetas por encima de 50 × 109/l en paciente traumáticos. | 1C |
| 26 | Se sugiere la transfusión de plaquetas para mantener recuentos por encima de 75 x 109/l en pacientes con sangrado activo cuando la hemorragia no cesa con cifras de 50 x 109/l. | 2C |
| 27 | Se sugiere el mantenimiento de un recuento de plaquetas por encima de 100 × 109/l en pacientes con sangrado masivo y traumatismo craneal. | 2C |
| 28 | Se sugiere una dosis inicial de cuatro a ocho concentrados de plaquetas (equivalentes a 1 - 2 pooles). La cadencia de administración debe ajustarse en función de la persistencia de la hemorragia, las cifras alcanzadas con la dosis inicial y la respuesta a otras medidas para controlar la hemorragia. | 2C |
| 29 | No se recomienda el empleo sistemático de la albúmina en pacientes con hemorragia masiva. | 1C |
| 30 | Se recomienda el uso de hemostáticos tópicos en combinación con las medidas convencionales en hemorragias asociadas a diferentes procedimientos quirúrgicos. | 1B |
| 31 | En el contexto de una hemorragia masiva, se recomienda el empleo de concentrados de complejo protrombínico en pacientes en tratamiento con anticoagulantes tipo antivitamina K para la reversión rápida de su efecto. | 1C |
| 32 | En el contexto de la hemorragia masiva, en pacientes no tratados con anticoagulantes orales tipo antivitamina k, no se recomienda el empleo de CCP como primera opción para la corrección de la coagulopatía, pudiendo emplearse en pacientes seleccionados en función de la urgencia del tratamiento y la disponibilidad de PF. | 1C |
| 33 | Se recomienda determinar rutinariamente el nivel plasmático de Fibrinógeno por método funcional coagulométrico (Clauss) o viscoelastométrico (Fibtem con ROTEM® o Functional Fibrinogen con TEG), con el fin de asegurar la efectividad del complejo protrombínico, dado que un nivel de fibrinógeno inferior a 2 g/l en esta situación clínica no asegura una buena hemostasia. | 1C |
| 34 | Se recomienda la administración de vitamina K intravenosa (10 mg) en los pacientes con hemorragia masiva en tratamiento con anticoagulantes tipo antivitamina K. Se recomienda no administrarla en un contexto similar en aquellos pacientes anticoagulados con un anticoagulante oral de acción directa. | 1C |
| 35 | No se recomienda usar complejo protrombínico activado en la hemorragia masiva, puesto que éste tiene indicaciones específicas en hemofilia congénita con inhibidor y hemofilia adquirida. | 1C |
| 36 | Se sugiere utilizar con precaución los complejos protrombínicos en pacientes con hemorragia masiva que amenaza la vida o tienen que ser intervenidos de cirugía urgente no demorable y que presentan alto riesgo trombótico, sugiriéndose como dosis máxima 20-25 UI/kg. | 2C |
| 37 | Se recomienda el método de determinación de fibrinógeno por el método de Clauss o mediante FIBTEM en el Rotem® o el *Functional Fibrinogen* en el TEGpara finalidades diagnósticas o cuando se deban tomar decisiones del manejo clínico de pacientes en el contexto de una hemorragia masiva. | 1C |
| 38 | Dado que la adecuada firmeza del coágulo sólo parece lograrse a partir de una concentración de fibrinógeno plasmático superior a 2 g/l, se recomienda administrarlo cuando no se alcance dicho umbral umbral por el método de Clauss, la FIBTEM-MFC en el ROTEM® sea inferior a 7 mm o, por equivalencia, la amplitud máxima del FLEV sea inferior a 10 mm . | 1C |
| 39 | Se sugiere una dosis inicial de 25-50 mg/kg de concentrado de fibrinógeno cuando no se alcance el umbral recomendado del mismo. | 2C |
| 40 | No se recomienda el factor VIIa como medida rutinaria de primer nivel, en el tratamiento de la hemorragia masiva. | 1B |
| 41 | Se recomienda la administración precoz (en las tres primeras horas) de ácido tranexámico en pacientes con hemorragia masiva secundaria a trauma. La dosis inicial recomendada es de 1 g en 10 minutos seguida de una infusión intravenosa de 1 g en 8 horas. La administración más tardía (más de 3 horas después del traumatismo), no se recomienda por el incremento de mortalidad asociado con hemorragia. | 1A |
| 42 | Se recomienda la valoración de medidas sin transfusión como la angioembolización o la utilización de procedimientos endovasculares en el tratamiento de la hemorragia masiva en pacientes seleccionados siempre que estén disponibles. | 1B |
| 43 | Se recomienda valorar la administración de desmopresina (0,3 μg/kg) en pacientes sangrantes con enfermedad de von Willebrand. | 1C |
| 44 | Se sugiere valorar la administración de desmopresina (0,3 μg/kg) en pacientes sangrantes urémicos o tomadores de aspirina. | 2C |
| 45 | Se recomienda monitorizar los niveles plasmáticos de calcio en el paciente sangrante. | 1C |
| 46 | Se sugiere mantener los niveles plasmáticos de calcio en el rango de la normalidad, administrando calcio en caso de hipocalcemia (Ca<0,9mmol/l). | 2B |
| 47 | Se recomienda considerar el manejo específico del sangrado en pacientes bajo el efecto de fármacos antiagregantes o anticoagulantes, en función del mecanismo de acción de cada uno de ellos | 1B |

*NE/GR: nivel de evidencia/grado de recomendación*
